# Supplementary figures and images for: Potential Roles of NIX/BNIP3L Pathway in Rat Traumatic Brain Injury
Source: PubMed Central journal article supplement — Cell Transplant. 2019 Apr 8;28(5):585–95. doi: 10.1177/0963689719840353 (PMC7103607; doi:10.1177/0963689719840353), 2019-04-08

Supplemental Figures

Figure 1.

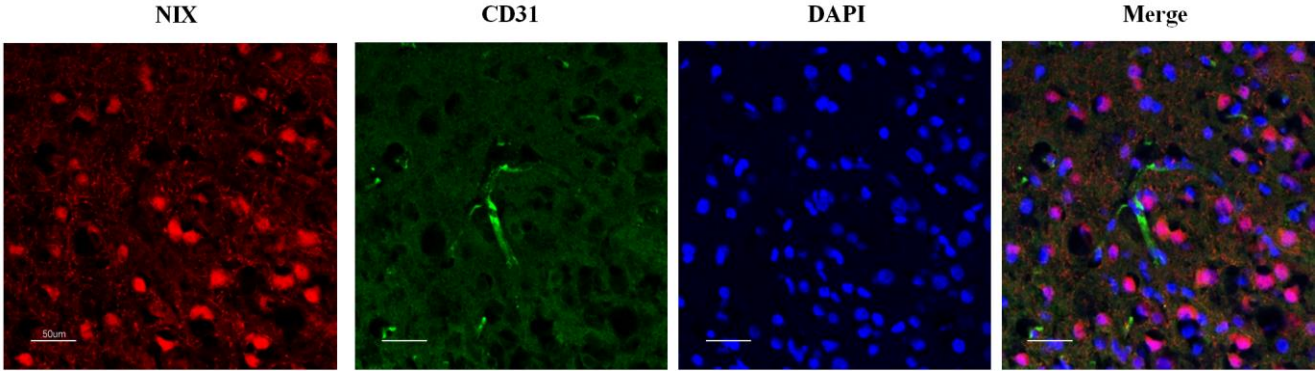

Figure 2.

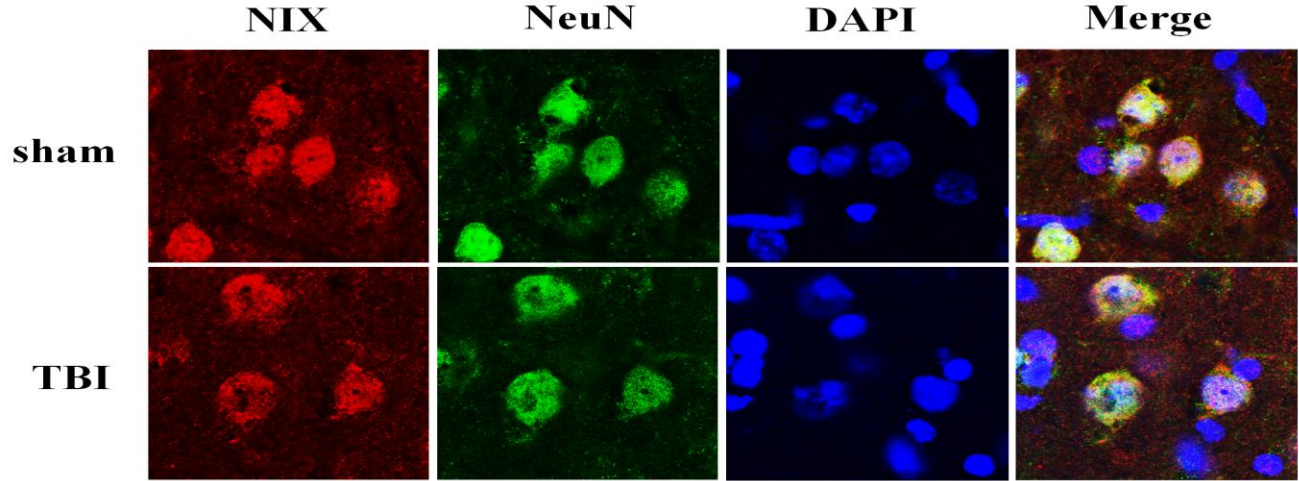

Supplement: Supplemental_Figures.pdf [file Supplemental_Figures.pdf]
